# Supplementary material for: Assessment of Healthcare Waste Management Paradigms and Its Suitable Treatment Alternative: A Case Study
Source: Hindawi journal article supplement (doi:10.1155/2018/6879751), 2018-07-29
Supplement: f1 [file 6879751.f1.docx]

**Survey Schedule**

**On**

**Assessment of Healthcare Waste Management Practices in Khulna municipality**

(For Administrator/Healthcare professionals)

Sample No.: Date: .................................................................................................................................

(Please answer the following questions)

**Q1. Hospital's name:**

Address: .................................................................................................................................................

**Q2. Name of the respondent:**

| **Age** | **Sex** | **Education** | | | **Occupation** | **Service length** |
| --- | --- | --- | --- | --- | --- | --- |
|  |  | Illiterate | Up to HSC | Graduate |  |  |

**Q3. How many beds are in your hospital/clinic'?**

Number of beds: Out-door patient:

**Q4. Is there any facility of disposing the hospital's waste? (use √ )**

Ans: i) Yes ii) No.

If yes. Please, mention the existing practices

| From | To | Frequency | | |
| --- | --- | --- | --- | --- |
| Once per day | Twice per day | Irregular |
| Patient's bed | Temporary storage place |  |  |  |
| Temporary storage place | Out of the HCEs |  |  |  |
| Temporary storage place | NGO's van |  |  |  |
| Outdoor | Municipal truck |  |  |  |
| Others |  |  |  |  |

**Q5. Which types of waste collection system of the Health Care Establishments (HCEs) are you**

**preferred'?**

i) Municipal open dustbin ii) NGO's covered bin iii) Others

**Q6. Is there any facility of healthcare waste treatment as well as management system?**

i) Yes ii) No

If yes, who collects the wastes from your hospitals/clinic? (use √)

i) Hospital authority ii) Municipal authority

iii) Organization's name:

How? Please, mention it as below

| Location of the treatment facility | Applicable method | Which types of wastes are treated |
| --- | --- | --- |
|  | Only incineration |  |
|  | Incineration and Dumping |  |
|  | Incineration and no treatment |  |
|  | Stream sterilization. Dumping and no treatment |  |
|  | Stream sterilization and no treatment |  |
|  | Stream sterilization. chemical treatment and dumping |  |
|  | Chemical treatment and dumping |  |
|  | No treatment and dumping |  |
|  | No treatment |  |

**Q7. Do you use any safety equipment against infectious diseases in the hospital?**

i) Yes ii) No iii) Others

**Q8. Have you get any institutional training on healthcare waste management system?**

i) Yes ii) No

If yes. i) Name of the training:

ii) Organization's name: iii) Duration of training:

**Q9. Is the present waste management of Health Care Establishments systematic?**

i) Yes ii) No

**Q10. Do you think the necessity of proper training on healthcare waste management?**

i) Yes ii) No

If yes, which method is suitable for proper training? (use √ )

1. Lecture ii) Video iii) Practical iv) Lecture and video

v) Lecture and practical vi) All the system vii) Others

**Q11. Size and fare (for hospitals and clinics):**

| Type | Number of beds | Fare (per day) |
| --- | --- | --- |
| General ward |  |  |
| Paying bed |  |  |
| Cabin (single bed) |  |  |
| Cabin (double bed) |  |  |

**Q12. Expenditure for Healthcare waste management (Expenditure of …………….month)**

| Sector | Number/description | Expenditure (monthly) |
| --- | --- | --- |
| Cleaning goods (bleaching powder, soda, soap, phenol, harpic, savlon etc, ) |  |  |
| Disposal pot (bowl, bucket, waste tray) |  |  |
| Glove/aprons for cleaners |  |  |
| Wage of the cleaners and sweepers |  |  |
| City corporation |  |  |
| NGO |  |  |
| Total |  |  |

Q 13.Do you satisfied on the present system of health care waste management in this hospital?

i) Yes ii) No

If no, which problems are you facing? Please mention it:

| 1. |  |
| --- | --- |
| 2. |  |
| 3. |  |

Q14. What is your suggestion for better healthcare waste management?

................................................................................................................................. ............. . ……………………….

Thanks for your co-operation Signature of the interviewer
